# Supplementary material for: Metaviromes Reveal the Dynamics of Pseudomonas Host-Specific Phages Cultured and Uncultured by Plaque Assay
Source: MDPI journal article supplement (doi:10.3390/v13060959), 2021-05-21
Supplement: s1 [file s1]

Supplementary material for the article:

# Metaviromes reveal the dynamics of *Pseudomonas* host-specific phages cultured and uncultured by plaque assay

Katrine Waceniuss Skov Alanin<sup>1,2,\*\*</sup>, Laura Milena Forero Junco<sup>1,\*\*</sup>, Jacob Bruun Jørgensen<sup>1</sup>, Tue Kjærgaard Nielsen<sup>1</sup>, Morten Arendt Rasmussen<sup>3</sup>, Witold Kot<sup>1,\*</sup> and, Lars Hestbjerg Hansen<sup>1,\*</sup>

<sup>1</sup> Department of Plant and Environmental Sciences, University of Copenhagen, 1871 Frederiksberg C, Denmark; laura.junco@plen.ku.dk (L.M.F.J.), jacobbruun@protonmail.com (J.B.J.) and tkn@plen.ku.dk (T.K.N.)

<sup>2</sup> Department of Environmental Science, Aarhus University, 4000 Roskilde, Denmark; Ksala@envs.au.dk (K.W.S.A.)

<sup>3</sup> Department of Food Science, University of Copenhagen, 1958 Frederiksberg C, Denmark; M.A.R.mortenr@food.ku.dk

<sup>4</sup> COPSAC, Copenhagen Prospective Studies on Asthma in Childhood, Herlev and Gentofte Hospital, University of Copenhagen, 2820 Gentofte, Denmark

\* Correspondence: L.H.H. lhha@plen.ku.dk and W. K. wk@plen.ku.dk

\*\* These authors contributed equally to the work presented

## Supplementary material

All supplementary material for the article “Spiked viromes reveal host-specific lytic phages uncultured by plaque assay”. These include:

**Figure S1:** Overview of the experimental setup, plaque assay and key findings

**Table S2:** Overview of DNA amount, quality, and reads after quality control (QC)

**Table S3:** Virsorter2 results on contigs

**Table S4:** Virsorter2 results on bp

**Table S5:** CheckV result on individual assemblies

**Figure S6:** Viral OTU composition

**Figure S7:** Accumulative abundance of all contigs in the three sample types

**Table S8:** Observed vOTUs in each of the virome samples

**Table S9:** Read mapping coverage of plaque-forming phages from organic waste sample (separate excel sheet)

**Table S10:** CRISPR hits on host taxonomy at species level

**Table S11:** Putative phage contigs that has a Log2FC above 1 or below – 1

**Table S12:** Putative phage contigs that has a Log2FC between -1 and 1 without a significant abundance

**Figure S1**

**Figure S1:** Overview of the experimental setup, sequencing platforms, and analysis. **Plaque assay:** Five single phages were isolated with either direct plating (Hovsa and GhostToast), PEG purification followed by direct plating (DrKristoffer and Otownlsak), or enrichment overnight similar to the incubation for DC3000 + and DC3000 – (SummerBoyErik). **Virome:** Visualization of the three types of viromes, DC3000 +, DC3000 – and Baseline. Incubation time for DC3000 + and DC3000 – was 8 hours at room temperature. **Key findings:** A total of 101,068 putative viral contigs was identified from all merged reads, and clustered into 35,070 viral operational taxonomical units referred to as viral populations (vOTUs), where 3,515 were >10 kb. We identified three of the five phages in the viromes, but observed that Otownlsak or Hovsa was the most enriched phage when incubated with DC3000 as they belonged to the same vOTU. *Pseudomonas* phages were confirmed to be significantly enriched when incubated with DC3000. Created with BioRender.com and restructured in Adobe Illustrator.

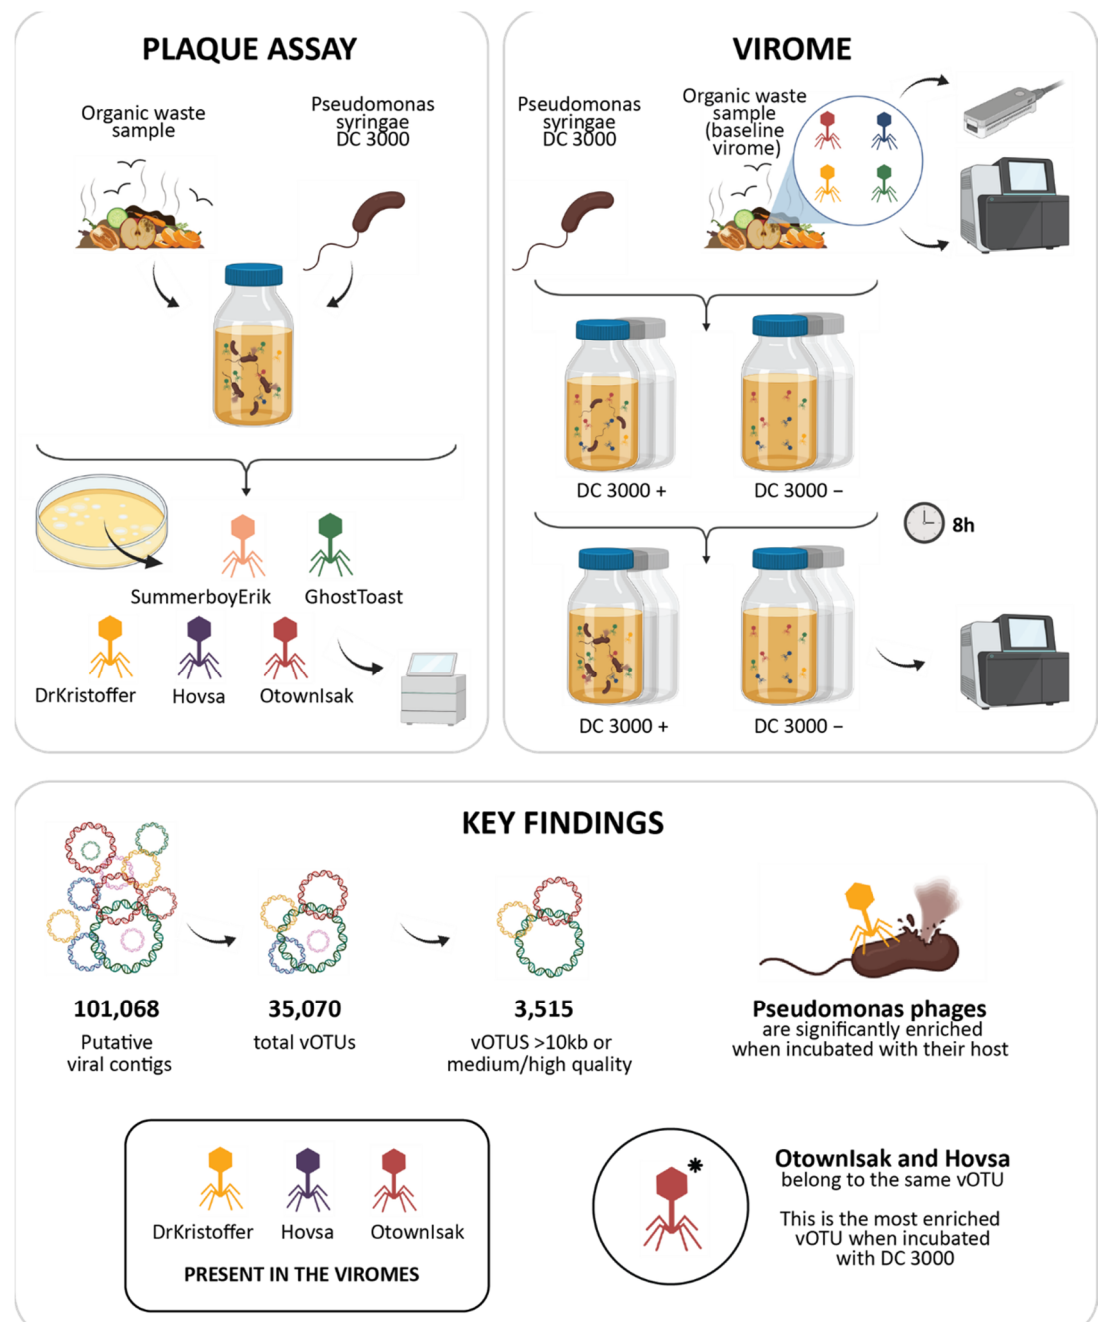

**Table S2**

**Table S2:** Overview of DNA amount, quality, and reads after quality control (QC) for each of the seven viromes used for the abundance analysis. N = Nanopore reads, P = paired Illumina reads, and UP = unpaired Illumina reads.

| Virome    | Total DNA<br>(ng) | Nanodrop<br>(260/280) / (260/230) | Post QC reads                      |
|-----------|-------------------|-----------------------------------|------------------------------------|
| Baseline  | 2,520             | (1.2) / (0.7)                     | N: 1251909, P: 9500926, UP: 453784 |
| DC3000+ A | 543               | (1.9) / (2.1)                     | P: 3641173, UP: 275037             |
| DC3000+ B | 474               | (1.8) / (2.1)                     | P: 4328342, UP: 350347             |
| DC3000+ C | 597               | (1.9) / (2.0)                     | P: 4558370, UP: 1861554            |
| DC3000- A | 4.76              | (0.3) / (0.2)                     | P: 5227108, UP: 333565             |
| DC3000- B | 25.6              | (0.4) / (0.3)                     | P: 4970642, UP: 438710             |
| DC3000- C | 24.4              | (0.4) / (0.3)                     | P: 5596835, UP: 408592             |

**Table S3**

**Table S3:** Virsorter2 results on contigs. Data of total contigs, as well as how much was identified putative viral and putative non-viral by VirSorter2.

| <b>Assembly</b>                             | <b>No. of putative viral contigs</b> | <b>No. of putative non-viral contigs</b> | <b>Total no. of contigs</b> | <b>% putative viral contigs</b> | <b>% putative non-viral contigs</b> |
|---------------------------------------------|--------------------------------------|------------------------------------------|-----------------------------|---------------------------------|-------------------------------------|
| Baseline metaSPAdes (Assembly 1)            | 11,867                               | 3,915                                    | 15,782                      | 75.2                            | 24.8                                |
| DC3000 + metaSPAdes (Assembly 2)            | 9,481                                | 2,690                                    | 12,171                      | 77.9                            | 22.1                                |
| DC3000 + A metaSPAdes (Assembly 3)          | 3,738                                | 883                                      | 4,621                       | 80.9                            | 19.1                                |
| DC3000 + B metaSPAdes (Assembly 4)          | 4,155                                | 1,091                                    | 5,246                       | 79.2                            | 20.8                                |
| DC3000 + C metaSPAdes (Assembly 5)          | 2,818                                | 686                                      | 3,504                       | 80.4                            | 19.6                                |
| DC3000 – metaSPAdes (Assembly 6)            | 16,925                               | 5,332                                    | 22,257                      | 76.0                            | 24.0                                |
| DC3000 – A metaSPAdes (Assembly 7)          | 6,796                                | 1,904                                    | 8,700                       | 78.1                            | 21.9                                |
| DC3000 – B metaSPAdes (Assembly 8)          | 6,389                                | 1,860                                    | 8,249                       | 77.5                            | 22.5                                |
| DC3000 – C metaSPAdes (Assembly 9)          | 6,647                                | 1,865                                    | 8,512                       | 78.1                            | 21.9                                |
| All samples hybrid metaSPAdes (Assembly 10) | 30,068                               | 9,666                                    | 39,734                      | 75.7                            | 24.3                                |
| Baseline Canu (Assembly 11)                 | 2,184                                | 113                                      | 2,297                       | 95.1                            | 4.9                                 |
| Baseline Canu (Assembly 12)                 | 2,184                                | 113                                      | 2,297                       | 95.1                            | 4.9                                 |

**Table S4**

**Table S4:** Virsorter2 results on bp. Data of total bp, as well as how much was identified putative viral and putative non-viral by VirSorter2

| <b>Assembly</b>                             | <b>No. of putative viral bp</b> | <b>No. of putative non-viral bp</b> | <b>Total no. of bp</b> | <b>% putative viral bp</b> | <b>% putative non-viral bp</b> |
|---------------------------------------------|---------------------------------|-------------------------------------|------------------------|----------------------------|--------------------------------|
| Baseline metaSPAdes (Assembly 1)            | 29,835,217                      | 5,643,379                           | 35,478,596             | 84.1                       | 15.9                           |
| DC3000 + metaSPAdes (Assembly 2)            | 21,504,440                      | 3,661,585                           | 25,166,025             | 85.5                       | 14.5                           |
| DC3000 + A metaSPAdes (Assembly 3)          | 9,004,304                       | 1,196,940                           | 10,201,244             | 88.3                       | 11.7                           |
| DC3000 + B metaSPAdes (Assembly 4)          | 9,500,589                       | 1,466,266                           | 10,966,855             | 86.6                       | 13.4                           |
| DC3000 + C metaSPAdes (Assembly 5)          | 6,364,929                       | 926,243                             | 7,291,172              | 87.3                       | 12.7                           |
| DC3000 – metaSPAdes (Assembly 6)            | 39,008,458                      | 7,481,007                           | 46,489,465             | 83.9                       | 16.1                           |
| DC3000 – A metaSPAdes (Assembly 7)          | 15,563,712                      | 2,596,593                           | 18,160,305             | 85.7                       | 14.3                           |
| DC3000 – B metaSPAdes (Assembly 8)          | 14,712,604                      | 2,586,311                           | 17,298,915             | 85.0                       | 15.0                           |
| DC3000 – C metaSPAdes (Assembly 9)          | 15,557,533                      | 2,593,590                           | 18,151,123             | 85.7                       | 14.3                           |
| All samples hybrid metaSPAdes (Assembly 10) | 86,640,254                      | 14,128,443                          | 100,768,697            | 86.0                       | 14.0                           |
| Baseline Canu (Assembly 11)                 | 27,445,358                      | 314,256                             | 27,759,614             | 98.9                       | 1.1                            |
| Baseline Canu (Assembly 12)                 | 27,436,635                      | 313,952                             | 27,750,587             | 98.9                       | 1.1                            |

**Table S5**

**Table S5:** CheckV result on individual assemblies. Distribution of contig quality identification by CheckV in regards to phage genome completeness for each of the 11 assemblies

| Assembly                                    | Complete/high | Medium | Low    | Not determined | Total vOTUs |
|---------------------------------------------|---------------|--------|--------|----------------|-------------|
| Baseline metaSPAdes (Assembly 1)            | 29            | 51     | 12,274 | 2,434          | 14,788      |
| DC3000 + metaSPAdes (Assembly 2)            | 17            | 31     | 9,865  | 1,532          | 11,445      |
| DC3000 + A metaSPAdes (Assembly 3)          | 6             | 19     | 3,805  | 492            | 4,916       |
| DC3000 + B metaSPAdes (Assembly 4)          | 7             | 20     | 4,346  | 582            | 4,955       |
| DC3000 + C metaSPAdes (Assembly 5)          | 5             | 11     | 2,941  | 385            | 3,342       |
| DC3000 – metaSPAdes (Assembly 6)            | 26            | 52     | 17,504 | 3,204          | 20,786      |
| DC3000 – A metaSPAdes (Assembly 7)          | 15            | 19     | 7,060  | 1,048          | 8,142       |
| DC3000 – B metaSPAdes (Assembly 8)          | 9             | 28     | 6,808  | 899            | 7,744       |
| DC3000 – C metaSPAdes (Assembly 9)          | 12            | 23     | 6,912  | 1,044          | 7,991       |
| All samples hybrid metaSPAdes (Assembly 10) | 132           | 196    | 29,751 | 6,401          | 36,480      |
| Baseline Canu (Assembly 11)                 | 116           | 171    | 1,595  | 122            | 2,004       |

**Table S6**

**Table S6:** Viral OTU composition of the population present in the three replicates of virome DC3000 + and DC3000 – and the baseline virome. **A** Hierarchical clustering of vOTUs based on Jaccard distances. **B** Pairwise Bray-Curtis distances. **C** PCoA plot. **D** Comparison of treatment – incubation of OW in LB media at room temperature for 8 hours with or without an overnight culture of DC3000. ANOSIM test statistic = 0.42 (p-value = 0.106).

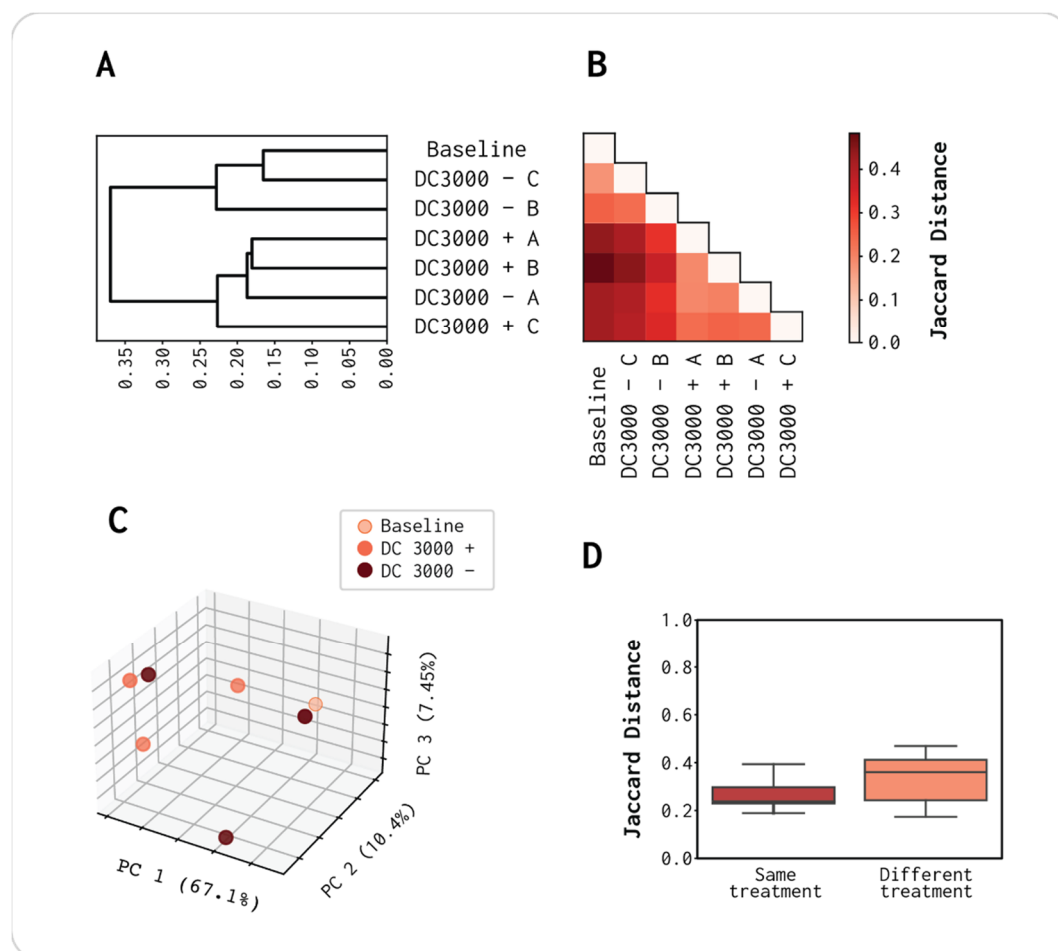

**Figure S7**

**Figure S7:** Accumulative abundance of all contigs in the three virome types.

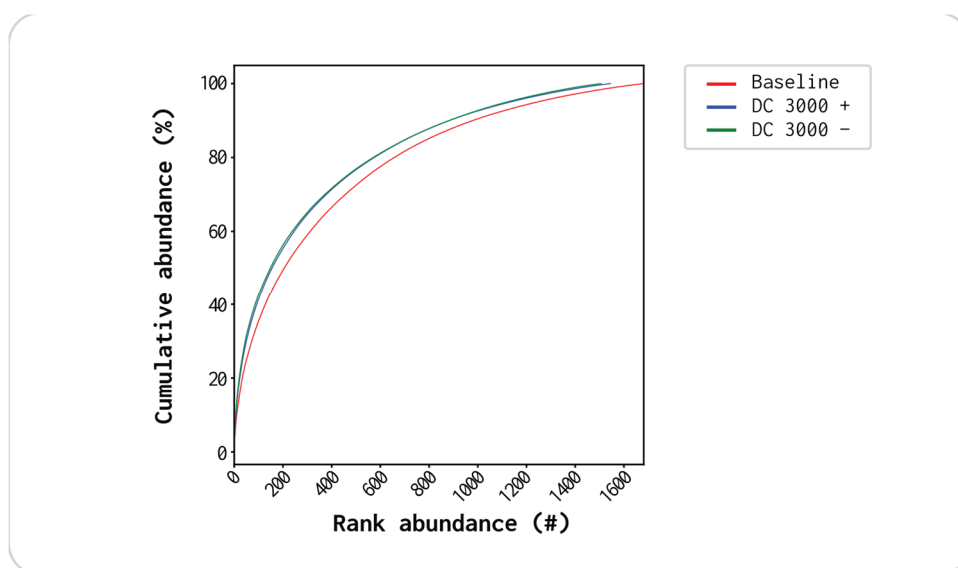



**Table S8**

**Table S8:** Observed vOTUs in each of the virome samples used for Figure 4 in the main text.

| Sample     | Observed vOTUs |
|------------|----------------|
| Baseline   | 1387           |
| DC3000 + A | 1547           |
| DC3000 + B | 1450           |
| DC3000 + C | 1316           |
| DC3000 – A | 1508           |
| DC3000 – B | 1500           |
| DC3000 – C | 1417           |

**Table S10**

**Table S10:** CRISPR hits on host taxonomy at species level. Out of the 3,515 viral populations, 1164 had hits to a bacterial CRISPR spacer from the Shmakov database. A total of 806 of those hits could be assigned to a host at the species level. Below are the genera with  $\geq 5$  assigned viral populations.

| Genus                | Count | Genus                  | Count |
|----------------------|-------|------------------------|-------|
| <i>Lactobacillus</i> | 209   | <i>Bifidobacterium</i> | 10    |
| <i>Pseudomonas</i>   | 47    | <i>Bacillus</i>        | 9     |
| <i>Xanthomonas</i>   | 18    | <i>Salmonella</i>      | 7     |
| <i>Dickeya</i>       | 18    | <i>Aeromonas</i>       | 7     |
| <i>Acinetobacter</i> | 17    | <i>Klebsiella</i>      | 7     |
| <i>Pediococcus</i>   | 14    | <i>Delftia</i>         | 6     |
| <i>Streptococcus</i> | 13    | <i>Yersinia</i>        | 6     |
| <i>Escherichia</i>   | 12    | <i>Pluralibacter</i>   | 5     |
| <i>Serratia</i>      | 11    | <i>Porphyromonas</i>   | 5     |
| <i>Acetobacter</i>   | 11    | <i>Bacteroides</i>     | 5     |

**Table S11**

**Table S11:** Putative phage contigs that has a Log2FC above 1 (Green dots) or below −1 (Red dots) (Figure 5A). Contigs were blasted using megablast. Denoted below are the top viral hit with lowest E-value and highest query coverage.

| Contig      | Size (Bp) | > 1: Log2FC > 1<br>< -1: Log2FC < -1 | Blast hit (Accession no.)                                                | Query coverage | Per. identity | E-value                |
|-------------|-----------|--------------------------------------|--------------------------------------------------------------------------|----------------|---------------|------------------------|
| tig00010143 | 20829     | > 1                                  | Lactobacillus phage iLp1308 (KR905070.1)                                 | 7%             | 77.16%        | 0.0                    |
| NODE_45     | 50899     | > 1                                  | Siphoviridae NHS-Seq1 (MH029512.1)                                       | 32%            | 80%           | 0.0                    |
| tig00000588 | 18290     | > 1                                  | Lactobacillus phage 3-SAC12 (MK504442.1)                                 | 3%             | 91.75%        | 2 × 10 <sup>−161</sup> |
| NODE_3      | 59207     | > 1                                  | Enterobacteria phage CAjan (KP064094.1)                                  | 100%           | 100%          | 0.0                    |
| NODE_45     | 10380     | > 1                                  | Lactococcus phage 56301 (NC_049405.1)                                    | 45%            | 85.77%        | 0.0                    |
| NODE_220    | 5166      | > 1                                  | Lactobacillus phage AQ113 (HE956704.1)                                   | 8%             | 84.40%        | 3 × 10 <sup>−119</sup> |
| NODE_2743   | 5420      | > 1                                  | Leuconostoc phage CHB (KX578043.1)                                       | 8%             | 67.40%        | 3 × 10 <sup>−29</sup>  |
| tig00001464 | 9726      | < -1                                 | Lactobacillus phage Lenus (NC_047897.1)                                  | 89%            | 97.35%        | 0.0                    |
| NODE_830    | 5136      | < -1                                 | Paramecium bursaria Chlerella virus CVM-1 (JX997163.1)                   | 1%             | 75.29%        | 0.003                  |
| NODE_690    | 6178      | < -1                                 | Lactobacillus phage 3-521 (NC_048753.1)                                  | 100%           | 97.28%        | 0.0                    |
| NODE_2693   | 5480      | < -1                                 | Lactobacillus phage 3-521 (NC_048753.1)                                  | 93%            | 97.70%        | 0.0                    |
| NODE_132    | 40054     | < -1                                 | Uncultured Caudivirales phage (LR796317.1)                               | 1%             | 68.32%        | 1 × 10 <sup>−37</sup>  |
| tig00000648 | 32820     | < -1                                 | Lactobacillus phage LR2 (MH837543.1)                                     | 5%             | 67.97%        | 3 × 10 <sup>−64</sup>  |
| tig00000040 | 44196     | < -1                                 | Escherichia phage C130_2 (NC_048067.1)                                   | 2%             | 76.66%        | 4 × 10 <sup>−127</sup> |
| NODE_852    | 11518     | < -1                                 | Phage apr34_1789 (MK415401.1)                                            | 0%             | 80.21%        | 2 × 10 <sup>−11</sup>  |
| tig00000828 | 11199     | < -1                                 | Proteus phage vB_PmiP_RS8pmA (MG575419.1)                                | 88%            | 93.04%        | 0.0                    |
| NODE_830    | 5580      | < -1                                 | <i>Lactococcus lactis</i> . Subs. <i>Lactis</i> strain G423 (CP024958.1) | 1%             | 80%           | 0.047                  |
| NODE_214    | 32484     | < -1                                 | Proteus phage PM75 (NC_027363.1)                                         | 61%            | 92.01%        | 0.0                    |

**Table S12**

**Table S12:** Putative phage contigs that has a Log2FC between -1 and 1 without a significant abundance (Figure 5A). Contigs were blasted using megablast. Denoted below are the top viral hit with lowest E-value and highest query coverage.

| Contig | Size (Bp) | 0-1: Log2FC 0-1<br>-1-0: Log2FC -1-0 | Blast hit (accession no.) | Query coverage | Per. identity | E-value |
|--------|-----------|--------------------------------------|---------------------------|----------------|---------------|---------|
|--------|-----------|--------------------------------------|---------------------------|----------------|---------------|---------|

|             |       |      |                                                |     |        |                        |
|-------------|-------|------|------------------------------------------------|-----|--------|------------------------|
| NODE_364    | 6226  | 0-1  | Proteus phage vB_PmiP_RS51pmB (MG575421.1)     | 6%  | 79.59% | 5 × 10 <sup>-44</sup>  |
| NODE_209    | 8610  | 0-1  | Bacteriophage sp. Isolate 179 (MN855830.1)     | 54% | 84.73% | 0.0                    |
| NODE_445    | 5408  | 0-1  | Lactobacillus phage ATCCB (MK504445.1)         | 21% | 76.79% | 1 × 10 <sup>-174</sup> |
| tig00001258 | 5764  | 0-1  | Lactobacillus phage AQ113 (HE956704.1)         | 16% | 72.53% | 1 × 10 <sup>-154</sup> |
| NODE_2231   | 6180  | 0-1  | Myoviridae sp. ctThM1 (MN582070.1)             | 9%  | 72.78% | 9 × 10 <sup>-50</sup>  |
| NODE_507    | 5015  | 0-1  | Bacteriophage sp. Isolate 103 (MN855801.1)     | 3%  | 73.96% | 1 × 10 <sup>-15</sup>  |
| NODE_165    | 6157  | 0-1  | Bacteriophage sp. Isolate 32 (MN855637.1)      | 0%  | 88.89% | 4 × 10 <sup>-05</sup>  |
| NODE_281    | 9947  | -1-0 | Xylella phage Usme (LR743523.1)                | 1%  | 75.94% | 1 × 10 <sup>-46</sup>  |
| NODE_244    | 10727 | -1-0 | Salmonella phage assan (MT074440.1)            | 20% | 69.49% | 3 × 10 <sup>-97</sup>  |
| tig00000616 | 17334 | -1-0 | Lactobacillus phage CL2 (KR905067.1)           | 5%  | 83.54% | 0.0                    |
| tig00010057 | 16105 | -1-0 | Lactobacillus phage LBR48 (GU967410.1)         | 8%  | 92.67% | 0.0                    |
| NODE_966    | 5065  | -1-0 | Bacteriophage sp. isolate 230 (MN855846.1)     | 41% | 83.45% | 0.0                    |
| NODE_1644   | 7563  | -1-0 | Lactobacillus phage ATCC 8014-B2 (NC_047739.1) | 22% | 80.31% | 0.0                    |
| NODE_2505   | 5716  | -1-0 | Lactobacillus phage ATCC 8014-B2 (NC_047739.1) | 84% | 85.48% | 0.0                    |
